# Supplementary material for: Hsp40 Protein DNAJB6 Interacts with Viral NS3 and Inhibits the Replication of the Japanese Encephalitis Virus
Source: PubMed Central journal article supplement (PMC6888364; doi:10.3390/ijms20225719), 2019-11-14
Supplement: ijms-20-05719-s001.pdf [file ijms-20-05719-s001.pdf]

# Hsp40 Protein DNAJB6 Interacts with Viral NS3 and Inhibits the Replication of the Japanese Encephalitis Virus

Yu-Qin Cao , Lei Yuan , Qin Zhao , Jian-Lin Yuan , Chang Miao , Yung-Fu Chang , Xin-Tian Wen , Rui Wu , Xiao-Bo Huang , Yi-Ping Wen , Qi-Gui Yan , Yong Huang , Xin-Feng Han, Xiao-Ping Ma and San-Jie Cao

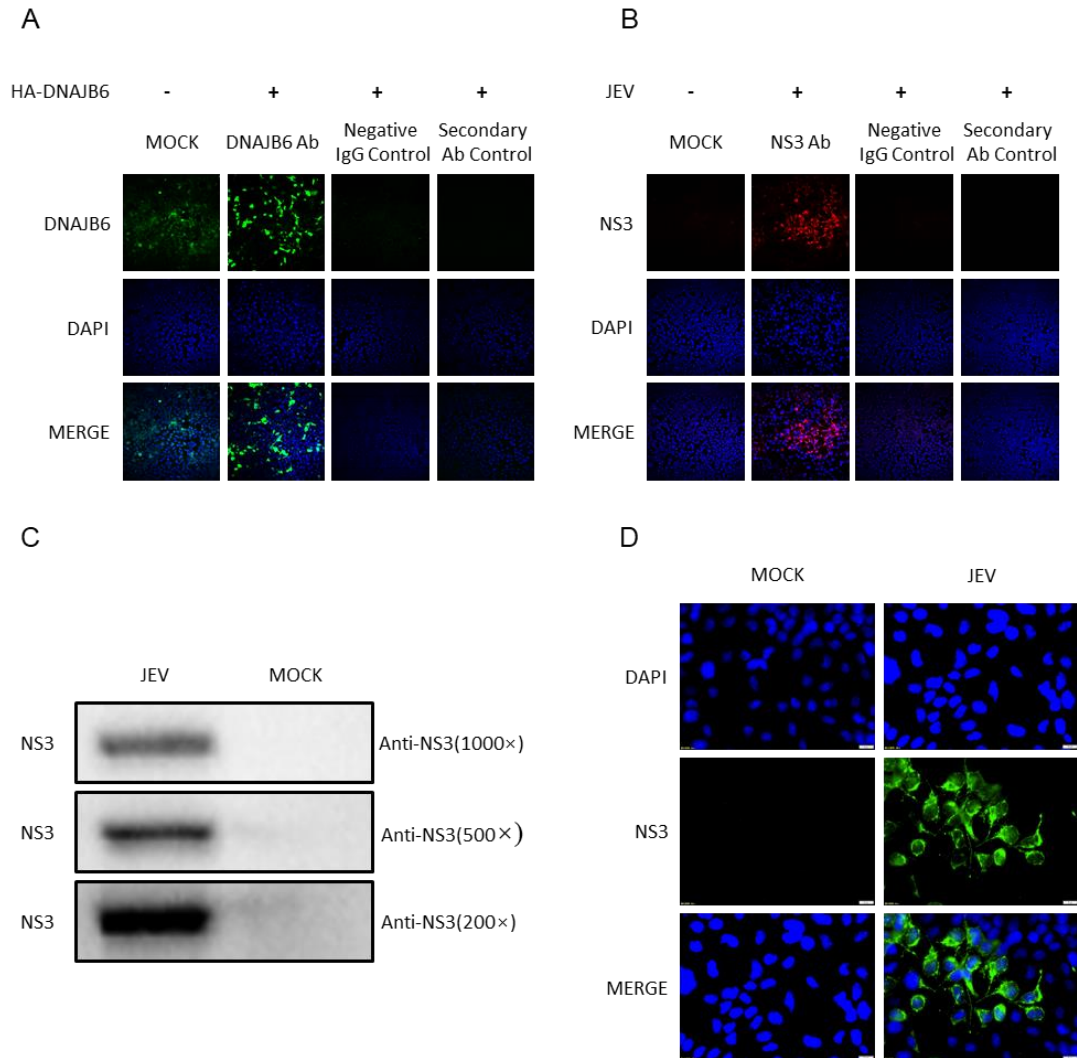

**Figure S1.** Immunofluorescence and western blot were performed to verify antibody specificity. **(A)** Immunofluorescence assays were performed to detect anti-DNAJB6 rabbit antibody specificity using a 1:200 dilution of the antibody. **(B)** Immunofluorescence assays were performed to detect anti-NS3 mouse antibody specificity using a 1:200 dilution of the antibody. **(C)** Western blot was performed to detect anti-NS3 rabbit antibody specificity and sensitivity using dilutions of 1:200, 1:500, and 1:1000 dilutions. **(D)** Immunofluorescence assays were performed to detect anti-NS3 rabbit antibody sensitivity using a 1:200 dilution of the antibody.
